# Supplementary material
Source: PubMed Central journal article supplement (PMC3980418)
Supplement: mmc1.pdf [file mmc1.pdf]

The American Journal of Human Genetics, Volume 94

Supplemental Data

**De Novo Mutations in the Beta-Tubulin Gene,  
*TUBB2A*, Cause Simplified Gyral Patterning  
and Infantile-Onset Epilepsy**

Thomas D. Cushion, Alex R. Paciorkowski, Daniela T. Pilz, Jonathan G.L. Mullins,  
Laurie E. Seltzer, Robert W. Marion, Emily Tuttle, Dalia Ghoneim, Susan L. Christian,  
Seo-Kyung Chung, Mark I. Rees, and William B. Dobyns

## Supplemental Data

**Table 1. *TUBB2A* sequence validation primers**

| Forward                    | Reverse                    |
|----------------------------|----------------------------|
| 3'-GGCCATCATGTTCTTGGAGT-5' | 5'-CAGCTGGTGGAAAACACAGA-3' |

**Table 2. Read depth and number of *de novo* non-synonymous variants for whole exome sequencing of subjects LR05-160 and DB12-007.**

|                                                        | LR05-160 | DB12-007 |
|--------------------------------------------------------|----------|----------|
| Mean read depth across exome                           | 77 x     | 115 x    |
| Mean read depth across <i>TUBB2A</i>                   | 43 x     | 38 x     |
| Total number of <i>de novo</i> non-synonymous variants | 68       | 54       |
